# Supplementary material
Source: MDPI journal article supplement (https://www.mdpi.com/2072-4292/12/16/2638)
Supplement: s1 [file s1]

## Supplementary Materials

### Spectrum and fractional cover of different components:

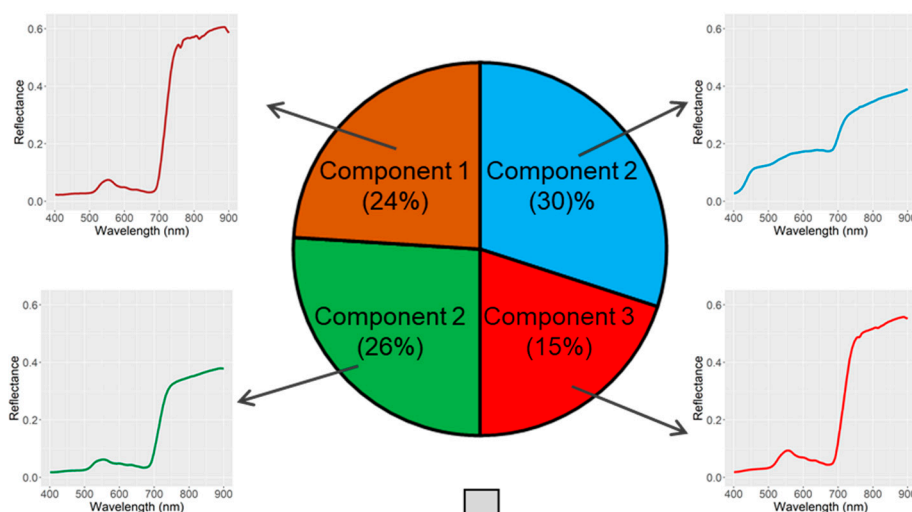

### Linear spectral mixing:

$$R_{mix}(\lambda) = \sum_{i=1}^n f_i \times R_i(\lambda)$$

### Simulated footprint spectrum:

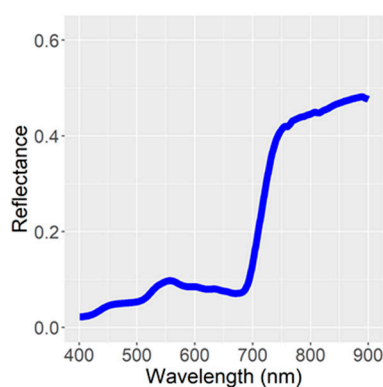

**Figure S1.** Illustration of linear spectral simulation for validation of *Osprey* spectral reflectance data. Spectrum of each component was acquired from the *in-situ* measurements using a Spectra Vista Corporation (SVC) HR-1024i spectrometer. Fractional cover of each component was from the image classification of RGB and TIR. The linear spectral mixing assumes that the spectrum of a footprint (i.e. the entire 'pie') is a linear mixture of its containing components.

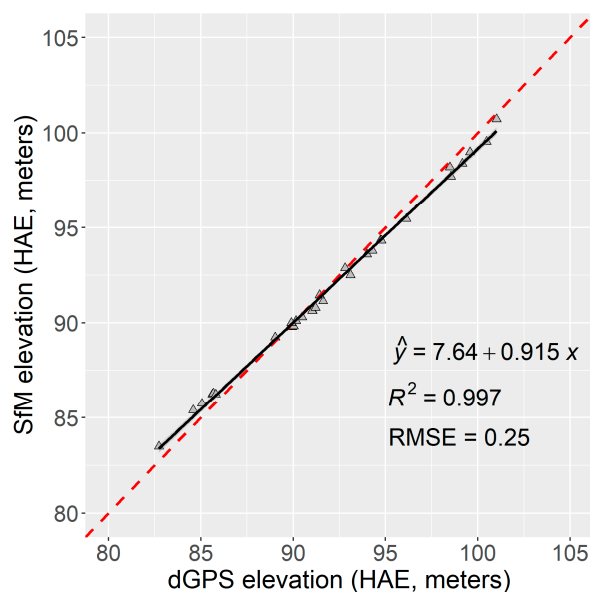

**Figure S2.** Comparison between Structure-from-Motion (SfM) derived DEM and those from dGPS measurements at Kougarok Hillslope case flight. The elevation was measured in height above ellipsoid (HAE). A  $R^2$  of 0.997 and RMSE of 0.25 m was achieved, indicating a high quality of the derived DEM.

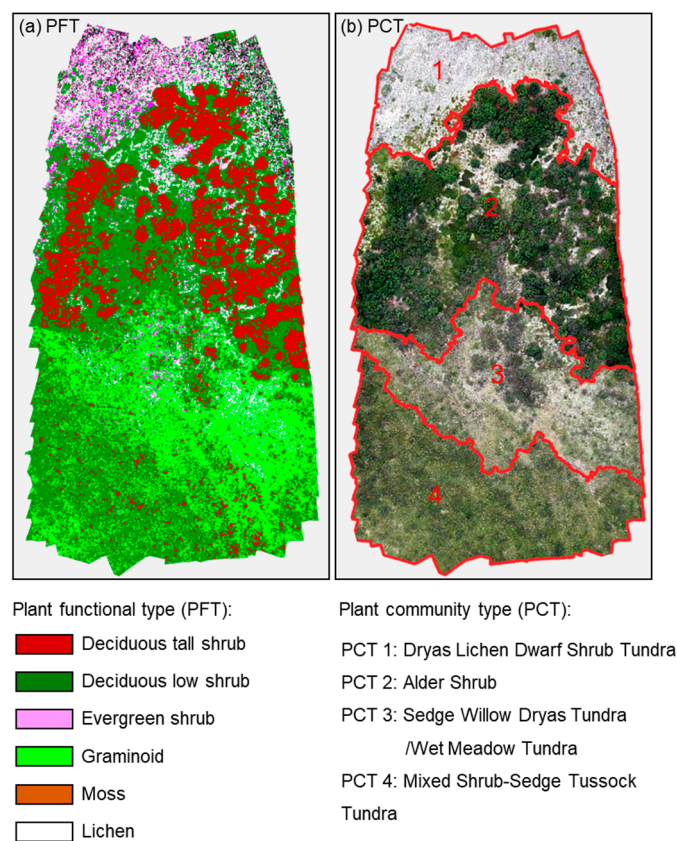

**Figure S3.** (a) Plant functional type (PFT) map merged from the raw image classification (i.e. Figure 5); (b) Representative plant community types (PCTs) identified in the case flight region.

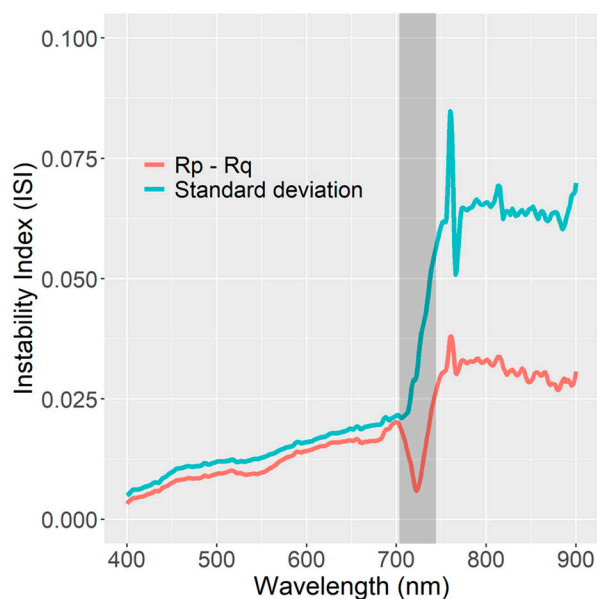

**Figure S4.** The intra-group standard deviation ( $\delta$ ) and inter-group difference ( $R_p - R_q$ ) terms in the instability index. Though higher inter-group differences are seen in near infrared range compared with visible to red edge, much higher intra-group variations are also seen in the near infrared range, leading to the relatively lower spectral separability (as shown in Figure 9c).

**Table S1.** Confusion matrix for PFT-level classification accuracy assessment. The diagonal cells (highlighted by bold text) correspond to reference samples that were correctly classified.

| <i>Reference samples</i>       |                                   |                        |                    |            |            |                   |             |
|--------------------------------|-----------------------------------|------------------------|--------------------|------------|------------|-------------------|-------------|
|                                | Deciduous<br>low to tall<br>shrub | Deciduous<br>low shrub | Evergreen<br>shrub | Graminoid  | Lichen     | Non-<br>vegetaion | Total       |
| <i>Classified results</i>      |                                   |                        |                    |            |            |                   |             |
| Deciduous low<br>to tall shrub | <b>170</b>                        | 45                     | 0                  | 3          | 0          | 2                 | 220         |
| Deciduous low<br>shrub         | 6                                 | <b>404</b>             | 81                 | 5          | 3          | 17                | 516         |
| Evergreen shrub                | 0                                 | 0                      | <b>310</b>         | 0          | 0          | 7                 | 317         |
| Graminoid                      | 0                                 | 7                      | 0                  | <b>169</b> | 0          | 0                 | 176         |
| Lichen                         | 2                                 | 0                      | 4                  | 0          | <b>281</b> | 4                 | 291         |
| Non-vegetation                 | 6                                 | 18                     | 11                 | 0          | 8          | <b>259</b>        | 302         |
| Total                          | 184                               | 474                    | 406                | 177        | 292        | 289               | <b>1822</b> |
| Producer's<br>accuracy         | 92.4                              | 85.2                   | 76.4               | 95.5       | 96.2       | 89.6              |             |

Note: overall accuracy: 87.43%; Kappa coefficient: 0.85.

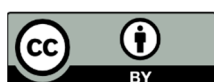

© 2020 by the authors. Licensee MDPI, Basel, Switzerland. This article is an open access article distributed under the terms and conditions of the Creative Commons Attribution (CC BY) license (<http://creativecommons.org/licenses/by/4.0/>).
